# Supplementary material for: Cross-sectional focusing of red blood cells in a constricted microfluidic channel
Source: Royal Society of Chemistry journal article supplement (doi:10.1039/c9sm01740b), 2019-11-29
Supplement: c9sm01740b1.pdf [file c9sm01740b1.pdf]

# Supplementary Information for “Cross-sectional focusing of red blood cells in a constricted microfluidic channel”

**Asena Abay<sup>a,b,‡</sup>, Steffen M. Recktenwald<sup>\*a,‡</sup>, Thomas John<sup>a</sup>, Lars Kaestner<sup>a,c</sup>, and  
Christian Wagner<sup>a</sup>**

<sup>a</sup>Dynamics of Fluids, Department of Experimental Physics, Saarland University, Saarbrücken, Germany

<sup>b</sup>Department of Hematopoiesis, Sanquin Research, Amsterdam, Netherlands

<sup>c</sup>Theoretical Medicine and Biosciences, Saarland University, Homburg, Germany

<sup>\*</sup>steffen.recktenwald@uni-saarland.de

<sup>‡</sup>These authors contributed equally to this work

## Supplementary Figures

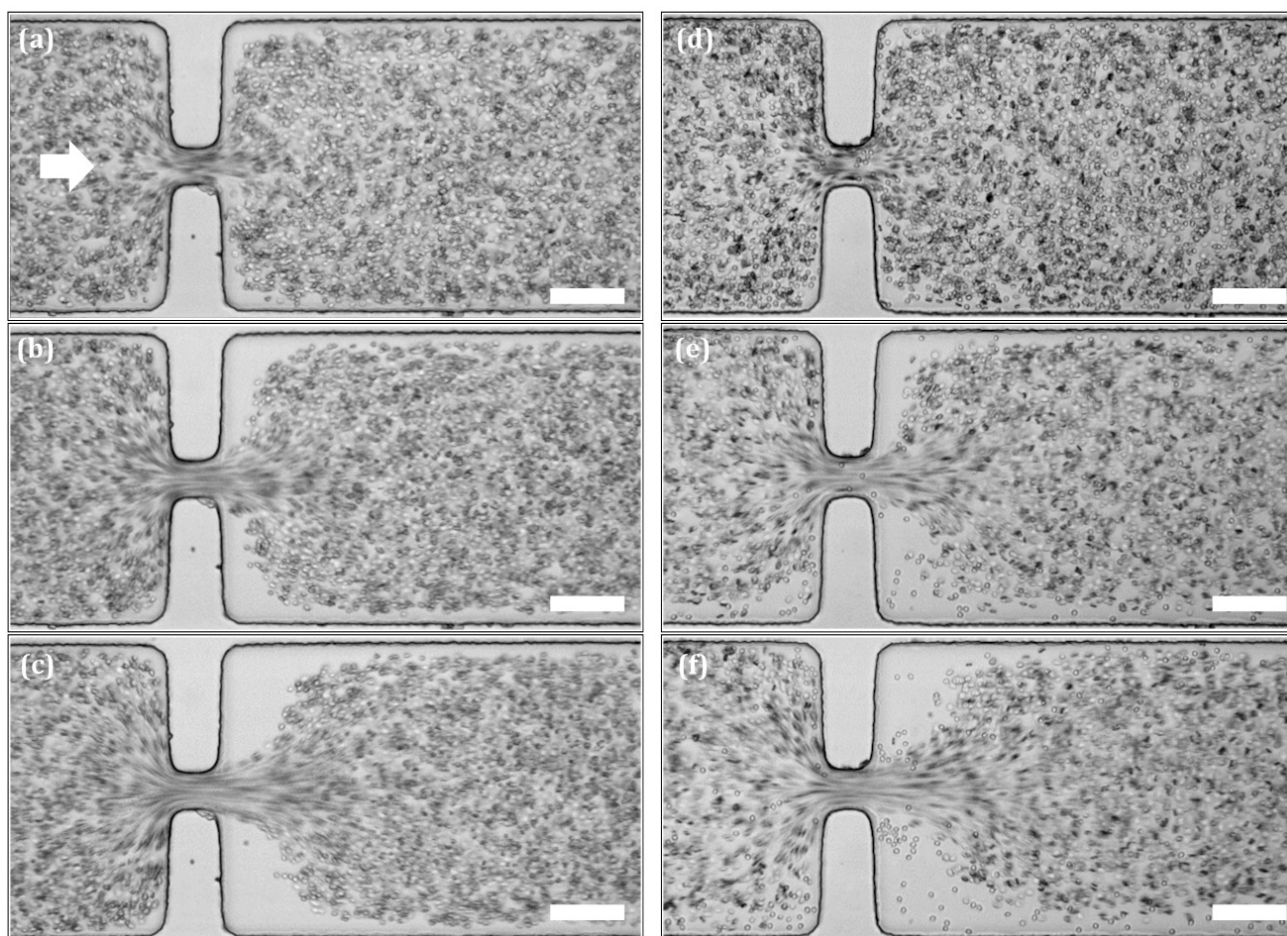

**Fig. S1** Microscopic snapshots of (a-c) a 5% *Ht* living RBC suspension and (d-f) a 5% *Ht* rigid RBC suspension flowing through the microfluidic contraction-expansion channel. From top to bottom the pressure drops are  $\Delta p = 40$  mbar,  $\Delta p = 100$  mbar, and  $\Delta p = 140$  mbar, respectively. The direction of flow is from left to right, as indicated by the white arrow. The white scale bars represent a length of 100  $\mu\text{m}$ .

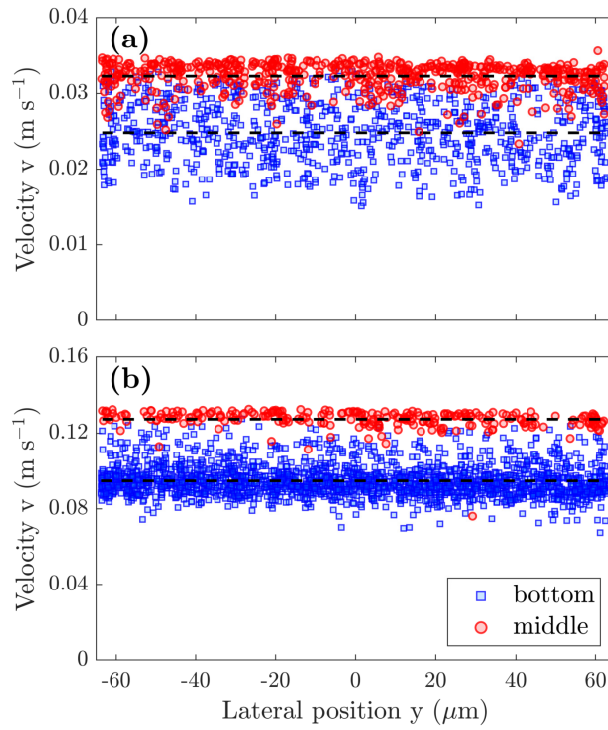

**Fig. S2** Velocity of rigid RBCs (1%  $Ht$ )  $x = 10$  mm post-contraction at a pressure drop of (a)  $\Delta p = 40$  mbar and (b)  $\Delta p = 140$  mbar. Cells are detected at channel center in  $y$  direction in two layers, close to the bottom ( $z \approx -15 \mu\text{m}$ ) and in the channel middle ( $z = 0$ ), represented as blue and red symbols, respectively. Dashed lines represent the mean velocities in each plane.

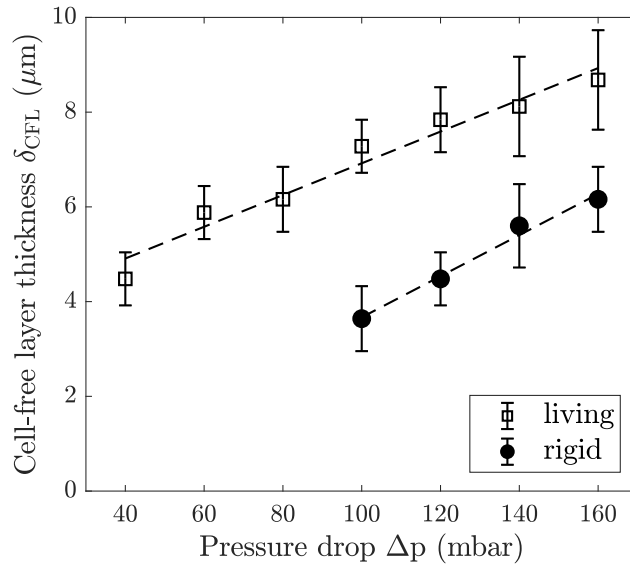

**Fig. S3** Thickness of the cell-free layer for rigid and living RBCs (5%  $Ht$ ) as a function of pressure drop. The thickness is calculated  $x = 10$  mm post-contraction. Dashed lines are to guide the eye.

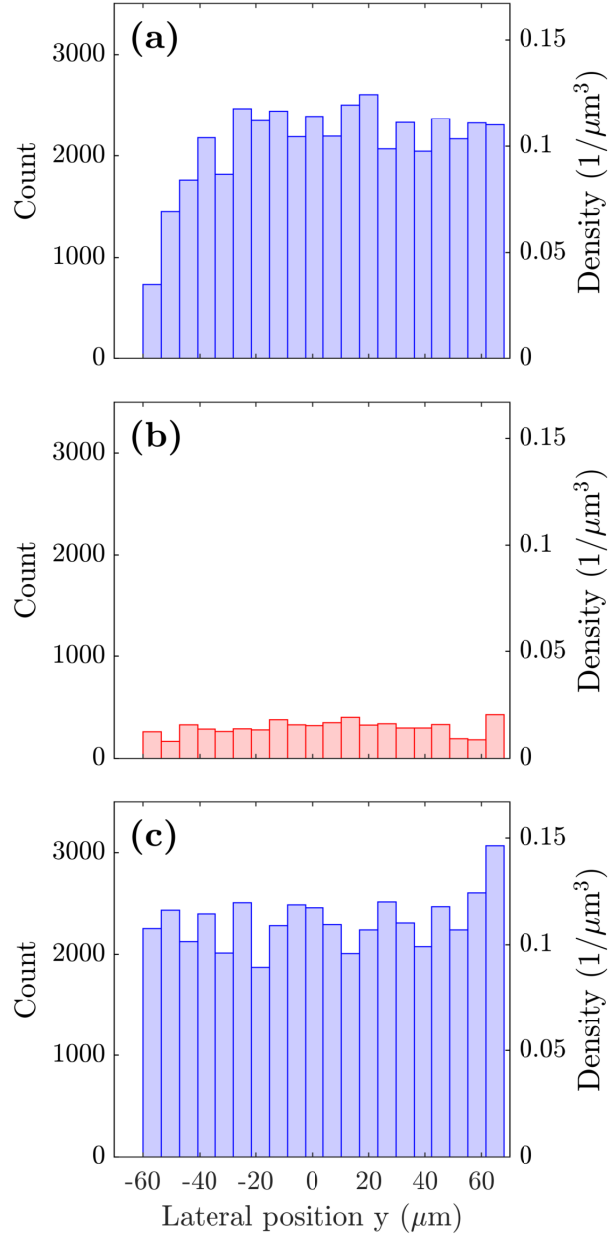

**Fig. S4** Distribution of rigid RBCs (1% *Ht*)  $x = 10$  mm post-contraction along the channel width close to the top (a), in the channel middle (b), and close to the bottom (c) in  $z$ -direction. The pressure drop is  $\Delta p = 140$  mbar. Data is accumulated over 4,000 frames.

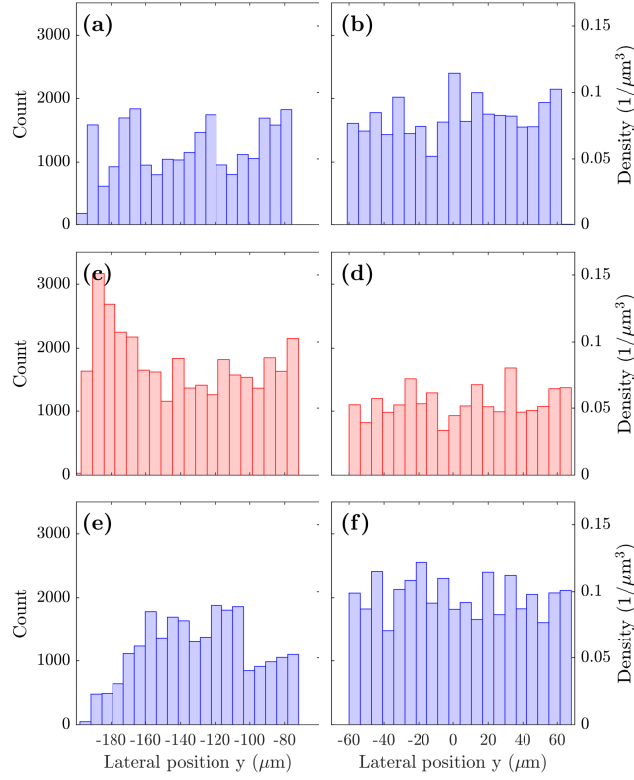

**Fig. S5** Distribution of rigid RBCs (1%  $H_t$ )  $x = 10$  mm post-contraction along the channel width close to the top (top row), in the channel middle (middle row), and close to the bottom (bottom row) in  $z$ -direction. (a), (c) and (e) represent the channel border and (b), (d) and (f) show the channel center in  $y$ -direction. The pressure drop is  $\Delta p = 40$  mbar. Data is accumulated over 4,000 frames.

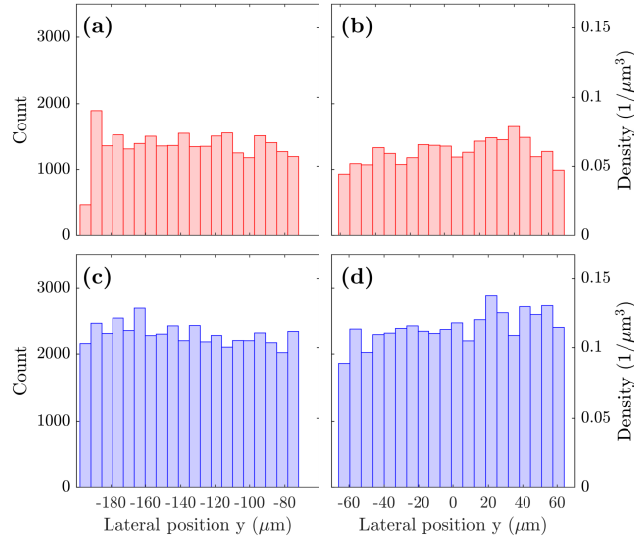

**Fig. S6** Distribution of rigid RBCs (1%  $H_t$ )  $x = 10$  mm pre-contraction along the channel width in the channel middle (upper row), and close to the bottom (lower row) in  $z$ -direction. (a) and (c) represent the channel border and (b) and (d) show the channel center in  $y$ -direction. The pressure drop is  $\Delta p = 140$  mbar. Data is accumulated over 4,000 frames.

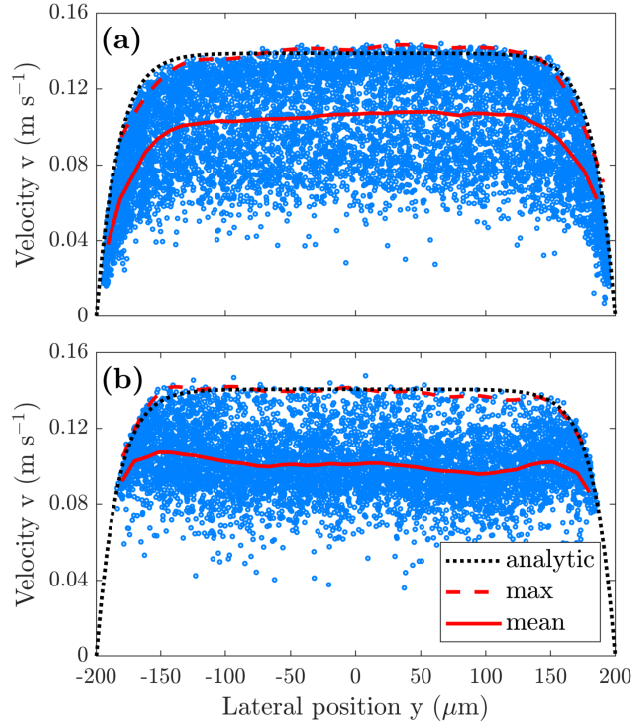

**Fig. S7** PTV: Velocities of individual rigid RBCs (1%  $Ht$ ), plotted as blue dots, at  $\Delta p = 140$  mbar (a)  $x = -10$  mm pre-contraction and (b)  $x = 10$  mm post-contraction. Data is acquired across the whole channel height, using a  $10\times$  lens with  $NA = 0.3$ . The dashed and solid red lines represent the maximum and mean velocities of all cells along the channel width, respectively. The dotted black line indicates the velocity profile for a Newtonian fluid across the channel middle  $z = 0$ .

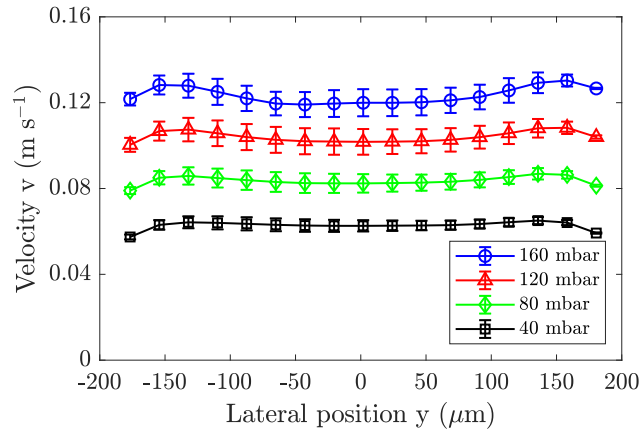

**Fig. S8** PIV: Mean velocity profiles across the channel width at  $x = 10$  mm post-contraction of living RBCs (5%  $Ht$ ) at different pressure drops in a density-matched solution (35% OptiPrep<sup>TM</sup> and 65% PBS).

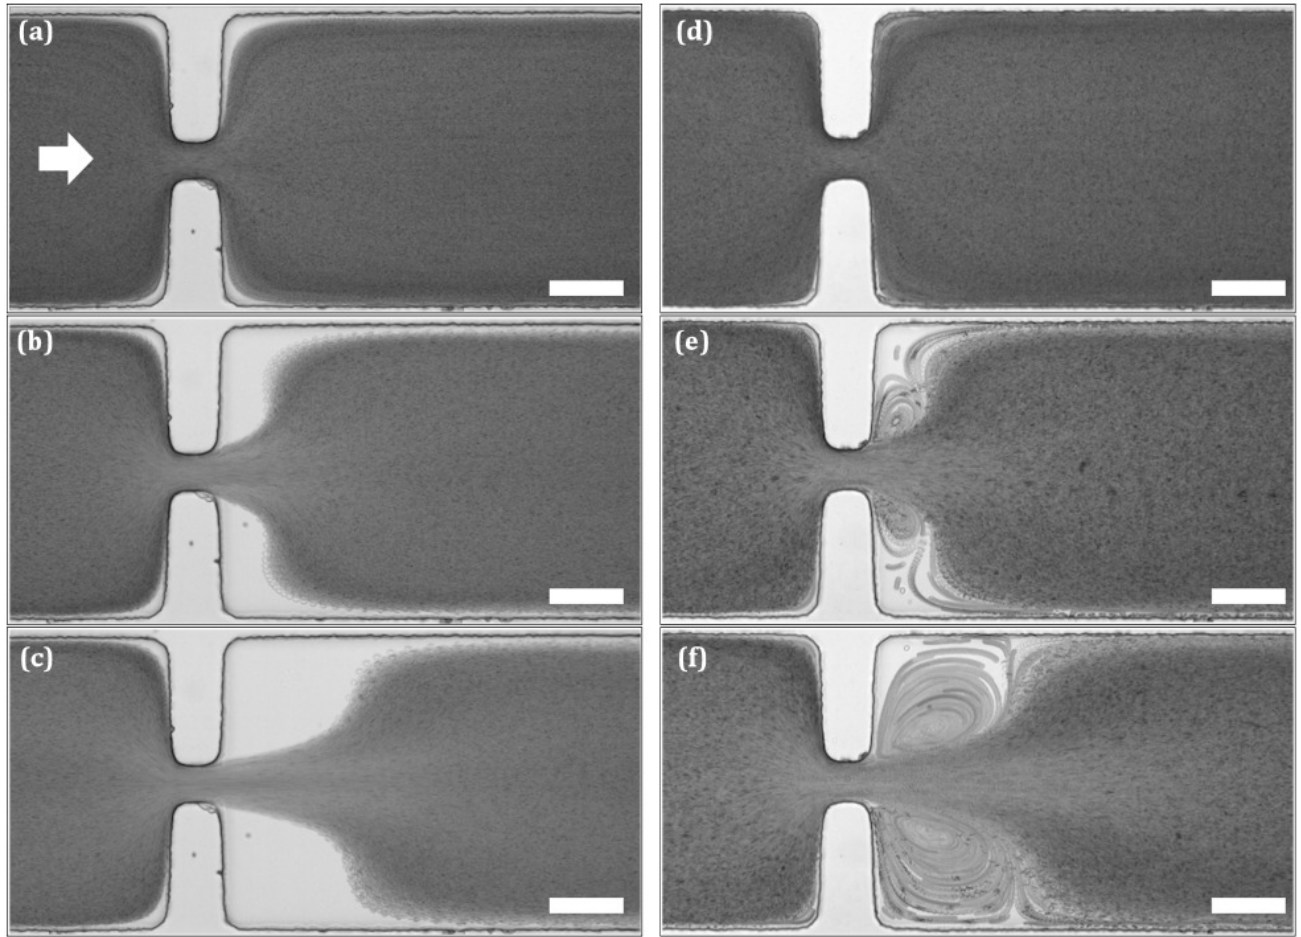

**Fig. S9** Time stacks of 1,050 microscopic images of (a-c) a 5% *Ht* living RBC suspension and (d-f) a 5% *Ht* rigid RBC suspension flowing through the microfluidic contraction-expansion channel. From top to bottom the pressure drops are  $\Delta p = 40$  mbar,  $\Delta p = 140$  mbar, and  $\Delta p = 240$  mbar, respectively. The direction of flow is from left to right, as indicated by the white arrow. The white scale bars represent a length of  $100 \mu\text{m}$ .
